# Supplementary material for: Substantial changes of gaseous pollutants and chemical compositions in fine particles in North China Plain during COVID-19 lockdown period: anthropogenic vs meteorological influences
Source: Copernicus journal article supplement (doi:10.5194/acp-2020-1199), 2021-01-04
Supplement: Supplementary file 1 [file acp-2020-1199-supplement.pdf]

# ***Supplementary Information***

**Title:** Substantial changes of gaseous pollutants and chemical compositions in fine particles in North China Plain during COVID-19 lockdown period: anthropogenic vs meteorological influences

**Authors:** Rui Li<sup>a</sup>, Yilong Zhao<sup>a</sup>, Hongbo Fu<sup>a,b,\*</sup>

**Affiliations:** <sup>a</sup> *Shanghai Key Laboratory of Atmospheric Particle Pollution and Prevention, Department of Environmental Science & Engineering, Institute of Atmospheric Sciences, Fudan University, Shanghai, 200433, P.R. China*

<sup>b</sup> *Collaborative Innovation Center of Atmospheric Environment and Equipment Technology (CICAET), Nanjing University of Information Science and Technology, Nanjing 210044, P.R. China*

**\* Correspondence to:**

Prof. Fu (Email: [fuhb@fudan.edu.cn](mailto:fuhb@fudan.edu.cn))

Number of pages: 7

Number of figures: 3

Number of tables: 3

**Figure S1** The performance of the random forest model in predicting the hourly concentrations of gaseous pollutants. The model was constructed with 90% original data and the remained data was applied to validate the model.

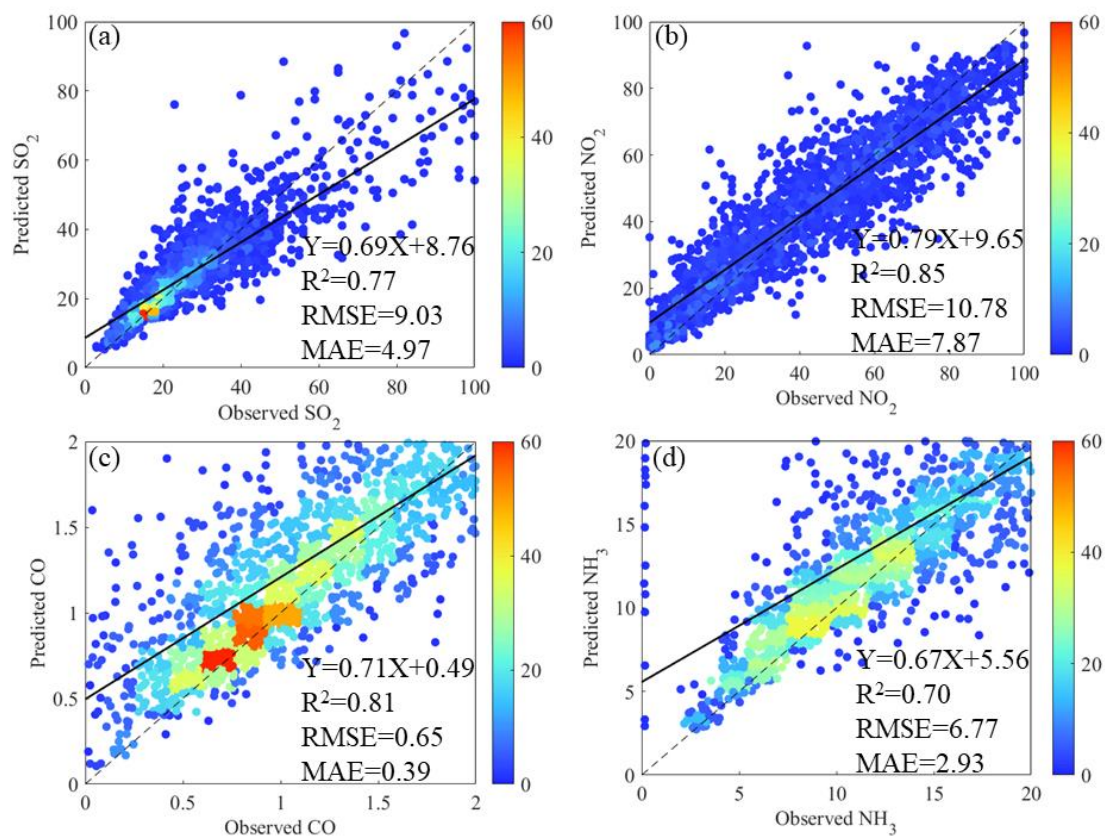

**Figure S2** The performance of the random forest model in predicting the hourly concentrations of water-soluble ions in PM<sub>2.5</sub>. The model was constructed with 90% original data and the remained data was applied to validate the model.

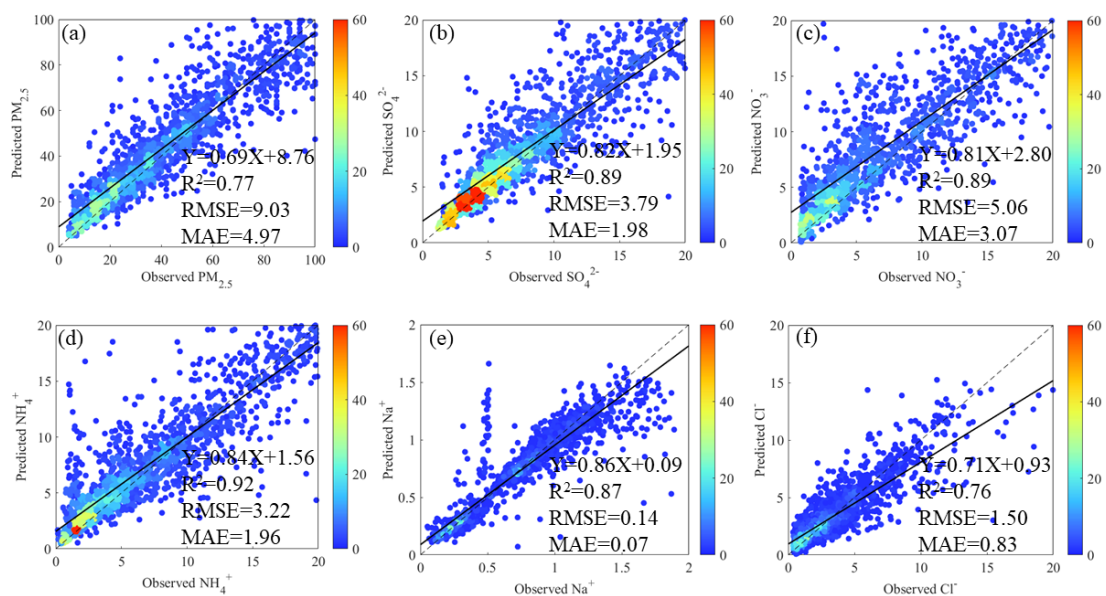

**Figure S3** The performance of the random forest model in predicting the hourly concentrations of trace elements in PM<sub>2.5</sub>. The model was constructed with 90% original data and the remained data was applied to validate the model.

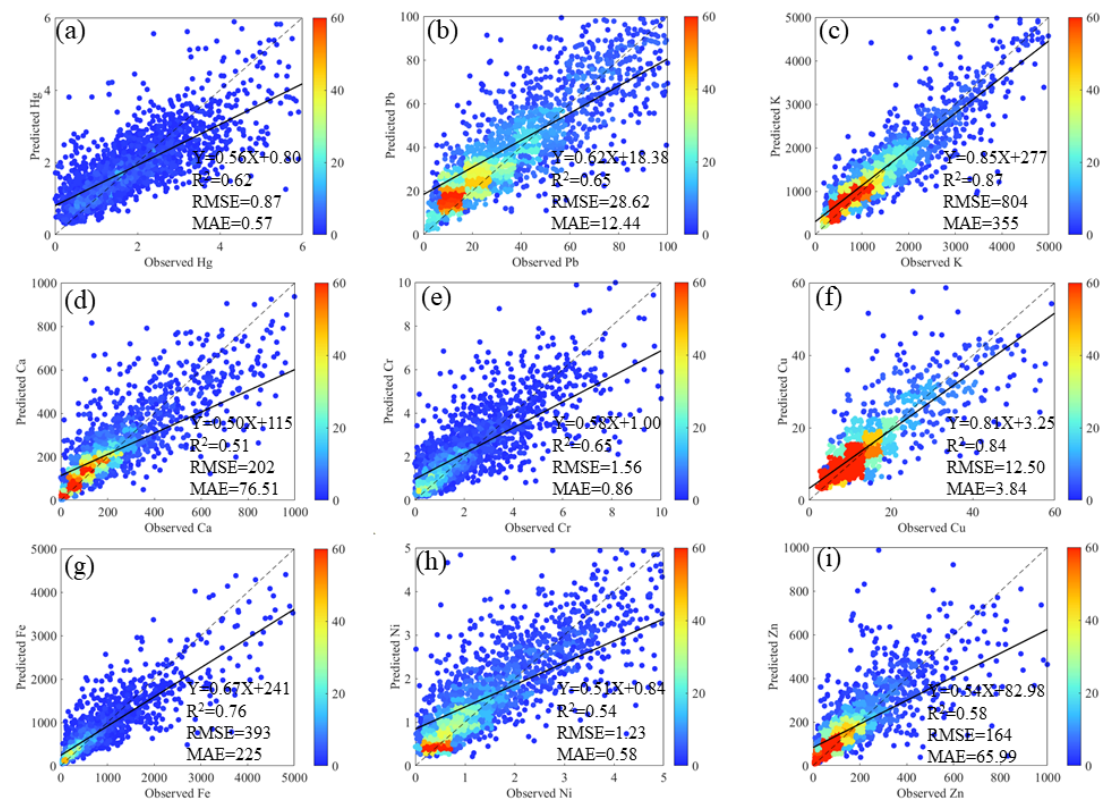

**Table S1** Summary of PMF error diagnostics based on DISP.

|                            |    |    |    |    |    |
|----------------------------|----|----|----|----|----|
| Error Code:                | 0  |    |    |    |    |
| The largest decrease in Q: | 0  |    |    |    |    |
| %dQ                        | 0  |    |    |    |    |
| Swaps by Factor:           | SF | IP | BB | CC | RD |
| dQmax=4                    | 0  | 0  | 0  | 0  | 0  |
| dQmax=8                    | 0  | 0  | 0  | 0  | 0  |
| dQmax=15                   | 0  | 0  | 0  | 0  | 0  |
| dQmax=25                   | 0  | 0  | 0  | 0  | 0  |

**Table S2** Summary of PMF error diagnostics based on BS.

| BS Mapping<br>( $r \geq 0.6$ ) | SF  | IP  | BB  | CC | RD  | Unmapped |
|--------------------------------|-----|-----|-----|----|-----|----------|
| SF                             | 100 | 0   | 0   | 0  | 0   | 0        |
| IP                             | 0   | 100 | 0   | 0  | 0   | 0        |
| BB                             | 0   | 0   | 100 | 0  | 0   | 0        |
| CC                             | 0   | 2   | 1   | 96 | 1   | 0        |
| RD                             | 0   | 0   | 0   | 0  | 100 | 0        |

**Table S3** Summary of PMF error estimation diagnostics from BS-DISP.

---

|                      |         |    |    |    |    |
|----------------------|---------|----|----|----|----|
| % of Cases Accepted: | 97%     |    |    |    |    |
| Largest Decrease in  | -25.4   |    |    |    |    |
| Q:                   |         |    |    |    |    |
| % $dQ$               | -0.0083 |    |    |    |    |
| # of Decreases in Q: | 1       |    |    |    |    |
| # of Swaps in Best   | 0       |    |    |    |    |
| Fit:                 |         |    |    |    |    |
| # of Swaps in DISP:  | 1       |    |    |    |    |
| Swaps by Factor:     | SF      | IP | BB | CC | RD |
| $dQ^{\max=0.5}$      | 0       | 0  | 1  | 0  | 0  |
| $dQ^{\max=1}$        | 0       | 0  | 1  | 0  | 0  |
| $dQ^{\max=2}$        | 0       | 0  | 1  | 0  | 0  |
| $dQ^{\max=4}$        | 0       | 0  | 1  | 0  | 0  |

---
